# Supplementary material for: Gut Contents as Direct Indicators for Trophic Relationships in the Cambrian Marine Ecosystem
Source: PLoS One. 2012 Dec 26;7(12):e52200. doi: 10.1371/journal.pone.0052200 (PMC3530608; doi:10.1371/journal.pone.0052200)
Supplement: Table S1 — Studied material ( Ottoia prolifica from the middle Cambrian Burgess Shale, British Columbia, Canada). The specimens are housed in the Royal Ontario Museum (ROM), Toronto, Canada and the Smithsonian National Museum of Natural History (originally US National Museum; USNM), Washington D.C. All the specimens have preserved digestive tracts with or without gut contents. (XLS) [file pone.0052200.s002.xls]

## Sheet: Feuil1
RQ
Field nb.	HY	BR	AG	TR	BD	ASE	SLE	description	ROM nb.	FIG. (this paper)
RQ 90-0285								Hyolithid (4CN) + ASE (3 elemernts)																																**********
RQ 90-0827								Hyolithid (1CN, OP)																																**********
RQ 90-0856 ( specimen 3)								Hyolithid (1CN)																																**********
RQ 90-0856 (specimen 1)								Hyolithid (1CN) + ASE (5 striated elements)																																**********
RQ 90-0856 (specimen 2)								Hyolithid (1CN)																																**********
RQ 90-1491								ASE (3, possibly 6, aligned)																																**********
RQ 90-1494	?							possibly hyolithids, brachiopods																																OOOOOOOOO
RQ 91-0086 (specimen 1)								complete gut, no visible elements																																OOOOOOOOO
RQ 91-0086 (specimen 2)								complete gut, no visible elements (black ribbon-like residues)																																**********
RQ 91-0105								complete gut no visible elements (black ribbon-like residues)																																**********
RQ 91-0143								Hyolithid (3CN, OP) + coarse undet. residues																																**********
RQ 91-0262								Hyolithid (1CN, HE) + ASE (5 striated elements)	61749	6F																														**********
RQ 91-0288								Hyolithid (1CN) + ribbon-like residues																																**********
RQ 91-0360								undet gut contents (coarse elements)																																**********
RQ 91-0362								gut with no elements																																**********
RQ 91-0384								Hyolithid (1CN)
RQ 91-0429 (specimen 1)								gut with no elements																																**********
RQ 91-0429 (specimen 2)								Hyolithid (4CN, OP)																																**********
RQ 91-0444								gut with no elements																																**********
RQ 91-0486 (specimen 4)								Brachiopod (2 Micromitra) + undet. residues																																**********
RQ 91-0486(specimen 3)								Brachiopod (2 Micromitra) + 1 Bradoriid + poss sclerites																																**********
RQ 91-0503								Trilobite (1PY) + Brachiopod (1 undet.) + numerous undet. fragments																																**********
RQ 91-0517								Hyolithid (1 CN) + Brachiopod (1 Mitromitra) + undet. exoskletal fragments	61750	8F																														**********
RQ 91-0554								anterior part very well-preserved (black area in gut, no element)	61751	2E																														**********
RQ 91-0633 (specimen 2)								very narrow gut (no elements)																																**********
RQ 91-0633 (specimen 1)								gut with no elements																																**********
RQ 91-0633 (specimen 1)								very narrow gut (no elements)																																**********
RQ 91-0650								Hyolithid (1 CN) + undet. residues in gut (granules)																																**********
RQ 91-0654								Brachiopods (2 Micromitra) + other undet. skeletal undet. elements																																**********
RQ 91-0752								gut almost complete, filled with black residues																																**********
RQ 91-1007								gut preserved with no visible elements																																**********
RQ 91-1012								gut preserved with no visible elements																																**********
RQ 91-1017								gut partly preserved but no visible elements																																**********
RQ 91-1048								gut with undet. elements (one possible hyolithid)																																**********
RQ 91-1059								gut complete with oval black mass of residues, no skeletal elements																																**********
RQ 91-1059								gut preserved with no visible elements																																**********
RQ 91-1061 (specimen 1)								gut partly preserved - no visible elements																																**********
RQ 91-1061 (specimen 2)								gut partly preserved - no visible elements																																**********
RQ 91-1061 (specimen 3)								gut partly preserved - no visible elements																																**********
RQ 91-1090								gut preserved, no element																																**********
RQ 91-1164								gut preserved, no visible elements	61752	2C																														**********
RQ 91-1287 (specimen 1)								gut preserved, black residues, no elements																																**********
RQ 91-1287 (specimen 2)								gut preserved, no visible elements
RQ 91-1287 (specimen 3)								gut preserved, no visible elements																																OOOOOOOOO
RQ 91-1295								gut preserved but no visible elements																																OOOOOOOOO
RQ 91-1313								Hyolithid (1 CN) + ASE (3 elliptical, slightly striated elements)																																**********
RQ 91-1331								Hyolithid (2 CN) + undet. granular residues																																**********
RQ 91-1359								Hyolithid (2 CN) + black undet. residues																																**********
RQ 91-1442 (specimen 1)								gut well-preserved complete, no identifiable elements																																**********
RQ 91-1442 (specimen 2)								gut well-preserved complete, no identifiable elements																																**********
RQ 91-1444 (specimen 1)								gut almost complete, no elements																																**********
RQ 91-1444 (specimen 2)								gut almost complete, no elements																																**********
RQ 91-1444 (specimen 3)								gut almost complete, no elements																																**********
RQ 91-1481								Hyolithid (1CN)																																**********
RQ 92-0004								gut preserved but with no elements																																**********
RQ 92-0021								Hyolithid (1 CN, OP)																																**********
RQ 92-0039								Bradoriid (1)																																**********
RQ 92-0040								Hyolithid (3 CN)																																**********
RQ 92-0128 (specimen 1)								gut preserved, mass of fine residues																																**********
RQ 92-0248A								Hyolithid (3 CN) + other undet elements (incl. granular residues)	61753A	7A																														**********
RQ 92-0368								Agnostid (2 Pagetia bootes, 1 complete) - worm in burrow																																**********
RQ 92-0733								gut preserved, no elements																																**********
RQ 92-0824								Hyolithid (1CN) + Brachiopods (3) + undet elements	61754	5G,H																														**********
RQ 92-0869								Agnostid (1) + numerous undet. elements (incl. possible trilobite elements)																																**********
RQ 92-0905								gut partly preserved, no elements																																**********
RQ 92-0920								gut preserved, no elements																																**********
RQ 92-1041								gut partly preserved, no elements																																**********
RQ 92-1204			?					possible Agnostid (very small, possibly Ptychagnostus praecurrens)																																**********
RQ 92-0125								gut preserved but no elements																																OOOOOOOOO
RQ 93-0038								Hyolithids (5 CN + OP) + ribbon-lik residues (fine material)	61747	6A-C																														**********
RQ 93-0103								gut preserved, possible trilobites (thoracic elements)																																**********
RQ 93-0117			?					small elements poss trilobite or agnostid fragments																																**********
RQ 93-0164								Brachiopod (1) , no diagnostic ornament																																**********
RQ 93-0171								Hyolithid (1 CN) + undet. elements																																**********
RQ 93-0222								gut preserved, no visible elements, black residues																																**********
RQ 93-0232 (specimen 1)								gut partly preserved, no visible elements																																OOOOOOOOO
RQ 93-0285								gut poorly preserved, no elements, black residues																																**********
RQ 93-0292								Hyolithid (1 CN) + undet. elements																																**********
RQ 93-0346 (specimen 1)						?		chain of rounded residues (some striated poss ASE) - only 1 specimen with gut contents																																**********
RQ 93-0374								gut preserved, almost empty																																**********
RQ 93-0375								gut preserved, no elements except black residues																																**********
RQ 93-0383								Hyolithid (1 CN + OP) + undet. elements																																**********
RQ 93-0385								gut preserved, no elements																																**********
RQ 93-0413								gut preserved, no elements																																**********
RQ 93-0415								Hyolithid (3 CN + OP) + ASE (ellepitical elements) + ribbon-like residues																																**********
RQ 93-0428 (specimen 1)								gut partly preserved, no elements																																**********
RQ 93-0444								Bradoriid (1), Agnostid (Pagetia bootes, thoracic fragment) + undet fragments																																**********
RQ 93-0445						?		gut preserved, possibly ASE elements																																**********
RQ 93-0468								gut preserved, undet. elements																																**********
RQ 93-0501 (specimen 1)								Brachiopod (Micromitra juv.) + undet contents																																**********
RQ 93-0522								Hyolithid (1 CN) + undet. elements																																**********
RQ 93-0526								Hyolithid (1 CN) + probable ASE (rounded elements) + ribbon-like residues																																**********
RQ 93-0616								gut preserved, undet. elements (posterior gut)																																**********
RQ 93-0656								Agnostid (2), most probably Pagetia bootes																																**********
RQ 93-0665			?					possible Agnostid (probably part of cephalon of Pagetia bootes)																																**********
RQ 93-0705								gut preserved, rounded elements probably bradoriid BD																																**********
RQ 93-0743								gut preserved, no element																																**********
RQ 93-0834								gut preserved, no element																																**********
RQ 93-0931								Hyolithid (2 CN)																																**********
RQ 93-0970 (specimen 1)								gut preserved, undet. elements, possibly 1 brachiopod																																**********
RQ 93-0982								gut preserved, ribbon-like residues																																**********
RQ 93-1039								gut preserved, possible trilobite elements																																**********
RQ 93-1041								gut preserved, no visible elements	61757	2D																														**********
RQ 93-1057								gut preserved, no visible elements																																**********
RQ 93-1076 (specimen 1)								gut preserved, no elements																																**********
RQ 93-1077B								Hyolithid (2 CN + 1 OP) + ASE + undet. elements	61758B	4																														**********
RQ 93-1079 (specimen 1)								Hyolithid (1 CN) + undet. elements																																**********
RQ 93-1086								gut preserved, no elements																																**********
RQ 93-1094								gut preserved no elements	61759	2B																														OOOOOOOOO
RQ 93-1095								gut preserved, undet. elements in anterior part																																**********
RQ 93-1126 (specimen 1)								gut preserved, no elements																																**********
RQ 93-1141								gut preserved, no elements	61760	2G																														**********
RQ 93-1145								Hyolithid (2 CN + 1 OP + HE)- one hyolithid with helens attached																																**********
RQ 93-1146 (specimen 1)								gut preserved, no element																																**********
RQ 93-1147								Bradoriid + black residues																																**********
RQ 93-1148								Hyolithid (1 CN)																																**********
RQ 93-1154								gut partly preserved, black residues, no elements																																**********
RQ 93-1155								Hyolithid (1 CN) + Brachiopod (1 Micromitra) + other undet. elements																																**********
RQ 93-1156					?			gut preserved with elements (possibly bradoriids)																																**********
RQ 93-1168								gut preserved, no elements																																OOOOOOOOO
RQ 93-1169 (specimen 1)								gut partly preserved, no elements																																**********
RQ 93-1196								Hyolithid (1 CN + OP), Trilobite																																**********
RQ 93-1221							?	gut preserved, black residues, possible SLE + undet. Elements																																**********
RQ 93-1237								gut preserved, black residues, no visible elements																																**********
RQ 93-1239								gut poorly preserved, no elements																																OOOOOOOOO
RQ 93-1243								Hyolithid (3 CN)																																**********
RQ 93-1249								gut preserved, no elements																																**********
RQ 93-1269								gut preserved, no elements																																**********
RQ 93-1309								gut preserved, black residues in posterior part																																**********
RQ 93-1389								Hyolithid (3 CN) + Brachiopod, (possibly Diraphora) + undet. other elements																																**********
RQ 93-1401	?							possible Hyolithid + black residues																																**********
RQ 93-1402								gut preserved, undet elements																																**********
RQ 93-1553								gut preserved, black residues in 3D																																**********
RQ 93-1566								gut preserved, numerous undet. elements																																**********
RQ 93-1604								gut preserved, undet elements																																**********
RQ 93-1691								gut preserved, black residues, no elements																																**********
RQ 93-1692								gut preserved, undet. black residues																																**********
RQ 93-1694 (specimen 1)								Hyolithid (1 CN and 1 OP in connection)																																**********
RQ 93-1697								gut preserved, no elements																																**********
RQ 95-0118								Hyolithid (2 CN + OP)																																**********
RQ 95-0925								SLE																																**********
RQ 95-1871								Hyolithid (1 CN) + 8 striated ASE																																**********
RQ 95-2095								Hyolithid (1CN)																																**********
RQ 97-0045								gut preserved, curved outline, black contents, no elements																																**********
RQ 97-0091								possible remains of arthropod shields (3 AS), black residues	61778	9H																														**********
RQ 97-0140 (specimen 1)	?							possible Hyolithid (1 CN), ribbon-like 3D-preserved residues (undet. elements)																																**********
RQ 97-0140 (specimen 2)								Agnostid (1 AG, probably Pagetia bootes)																																**********
RQ 97-0140 (specimen 3)								Hyolithid (1 CN) + undet. elements																																**********
RQ 97-0146								Brachiopods (Micromitra burgessensis, 2 ind. with 2 valves) + black residues + undet elements	61779	6I-K																														**********
RQ 97-0158								gut partly preserved																																OOOOOOOOO
RQ 97-0180								gut preserved, 3D undet. residues																																**********
RQ 97-0205A (large slab)								numerous Ottoia on rock slab, no detailed information on gut structure	61780A	2A																														****7 *****
RQ 97-0239								gut partly preserved, black residues																																**********
RQ 97-0244								Hyolithid (2 CN), Brachiopod (fragment of Micromitra burgessensis ) + undet. 3D residues																																**********
RQ 97-0248								fragments of gut (poorly preserved)																																OOOOOOOOO
RQ 97-0271								Hyolithid (1CN) + undet. residues																																**********
RQ 97-0304								gut preserved, no elements (worm in burrow)																																OOOOOOOOO
RQ 97-0379								gut partly preserved, no elements																																OOOOOOOOO
RQ 97-0389								possible setae of arthropod appendage																																**********
RQ 97-0528								Brachiopod ( 1 Micromitra burgessensis) + other 3D residues	61756	8E																														**********
RQ 97-0534								gut preserved, no visible elements																																**********
RQ 97-0579								Hyolithid (2 CN) + undet. 3D elements																																**********
RQ 97-0593								gut completely preserved, flat, no elements																																**********
RQ 97-0690								gut preserved, no elements																																**********
RQ 97-0694								gut preserved, no elements																																**********
RQ 97-0744							?	gut preserved, black residues with setae-like elements																																**********
RQ 97-0870								Brachiopod (possibly 1 Diraphora) + tiny elements																																**********
RQ 97-0881								gut preserved, SLE																																**********
RQ 97-0883								Hyolithid (1 CN)																																**********
RQ 97-0931						?		gut partly preserved, possible ASE																																OOOOOOOOO
RQ 97-1229								gut preserved, no elements, carbonaceous film																																**********
RQ 97-1387								gut preserved , no elements																																**********
RQ 97-1653								gut preserved, undet. elements																																**********
RQ 97-1654								gut partly preserved, no elements																																OOOOOOOOO
RQ 97-1733								Hyolithid (1 CN), Agnostid (1 AG, possibly Ptychagnostus praecurrens)	61783	8I, J																														**********
RQ 97-1884								gut preserved, undet. residues in 3D																																**********
RQ 97-1885 (specimen 1)								gut preserved, undet. elements																																**********
RQ 97-2152								gut partly preserved, no elements																																**********
RQ 97-2175								gut preserved, undet. shelly elements																																**********
RQ 97-2259								gut preserved, possible Trilobite small fragments (hypostome ? cephalon ?)																																**********
RQ 97-2279				?	?			Hyolithid (2 CN) + undet. arthropod material (poss. Trilobite and Bradoriid) + undet. elements																																**********
RQ 97-2393								gut preserved, black residues																																**********
RQ 97-2619								gut preserved, no elements																																**********
RQ 98-0884								worm possibly in BURROW to be checked																																**********
RT
Field nb.	HY	BR	AG	TR	BD	ASE	SLE	description	ROM nb.
RT 90-0215								gut preserved, no elements																																**********
RT 95-0020								Hyolithid (2 CN + OP) (opercule + cone) + possible arthropod setae																																**********
RT 95-0094 (specimen 1)								Hyolithid (5 CN + OP + HE)																																**********
RT 95-0218								ASE (striated elements)																																**********
RT 95-0118								Hyolithid (2 CN)	61767	6D																														**********
RT 95-1543								Hyolithid (1 CN)																																**********
WQ
Field nb.	HY	BR	AG	TR	BD	ASE	SLE	description	ROM nb.
WQ 00-1200 (specimen 1)								gut preserved possible BR + poss H, poss TR + section with setae-like features																																**********
WQ 00-1286								gut, uncompletely preserved, enigmatic element																																**********
WQ 00-1718B								gut very uncompletely preserved, 2 very well-defined ASE	61745B	12I																														**********
WQ 00-1911								gut partly preserved,Trilobite present but outside gut tract																																**********
WQ 00-2693								gut preserved, only post part of worm, numerous ASE (12 elements)																																**********
WQ 00-3520								Hyolithid (2 CN)																																**********
WQ 93-1330								gut preserved, no elements (uncomplete specimen-only anterior part)																																OOOOOOOOO
WQ 93-1539								Hyolithid (2 CN, HE)																																**********
WQ 93-1589								gut preserved, no elements, carbonaceous film																																**********
WQ 93-1645								Hyolithid (2 CN)																																**********
WQ 93-1718								Trilobite (thoracic part)	61761	9C,D																														**********
WQ 93-1770								gut preserved, no elements																																**********
WQ 94-0014								molted cuticle-no gut structure preserved																																DO NOT INCLUDE
WQ 94-0598								worm compressed antero-posteriorly, no elements in gut																																**********
WQ 94-0759 (specimen 1)							?	gut preserved, undet elements (possible SLE)																																**********
WQ 94-0771								gut preserved, probable packed SLE																																**********
WQ 94-0898								molted cuticle-no gut structure preserved																																DO NOT INCLUDE
WQ 94-0982								gut preserved (coiled portion), undet elements																																**********
WQ 94-1046								gut preserved, probable Agnostid (1 AG) + enigmatic elements																																**********
WQ 94-1164								gut preserved, no elements																																OOOOOOOOO
WQ 94-1169								gut preserved, ASE (striated)																																**********
WQ 94-1170								Hyolithid (1 CN)																																**********
WQ 94-1216								gut preserved, no elements (small specimen)																																OOOOOOOOO
WQ 94-1326								Hyolithid (1 CN) + ASE (4 possible sclerites)																																**********
WQ 94-1355								molted cuticle-no gut structure preserved																																DO NOT INCLUDE
WQ 94-1555 (specimen 1)								Hyolithid (1 CN), possible SLE + undet. Elements																																**********
WQ 94-1586 (specimen 1)								Bradoriid (1 BD)																																**********
WQ 94-1611								gut preserved (partly) undet. elements																																**********
WQ 94-1744								Hyolithid (1 CN) + undet. elements																																**********
WQ 94-1765 (specimen 1)								Trilobite (in anterior gut)																																**********				?
WQ 94-1945					?			gut preserved , SLE, possible Bradoriid (1 BD) + undet. elements																																**********
WQ 94-1946								small worm with post hooks, part of gut preserved																																**********
WQ 94-2085					?			gut preserved (partly), poss. Bradoriid (1 BD)																																**********
WQ 94-2149								gut preserved, SLE + granule-like elements	61789	11																														**********
WQ 94-2207						?		small worm, gut partly preserved, no elements, except 2 possible ASE																																**********
WQ 94-2293								gut preserved, no elements	61764	2I																														**********
WQ 94-2305								small worm, undet. element in gut																																**********
WQ 94-2311								very small worm, no clear gut structure																																**********
WQ 94-2381								gut preserved (loop), ASE (1 element) + black residues																																**********
WQ 94-2414						?		gut preserved (partly), pharynx everted, possible ASE + undet. elements	61765	2F																														**********
WQ 94-2467			?					gut preserved, 1 possible bivalved arthropod, Bradoriid ( 1 BD), possible Agnostid (1 CE)																																**********
WQ 94-2536								gut preserved, SLE																																**********
WQ 94-2538								only posterior part of worm, hooks, no gut structure																																DO NOT INCLUDE
WQ 94-2601								small worm with pharynx retracted, gut preserved, SLE																																**********
WQ 94-2749								gut preserved, SLE (numrerous elements)	61786	11																														**********
WQ 94-2841 (specimen 1)								gut preserved, small sponge (chance association, not in gut)																																**********
WQ 94-2841 (specimen 2)								Bradoriid (2 valves)	61766	S1I-K																														**********
WQ 94-2872								gut preserved, worm with U-curved shape																																OOOOOOOOO
WQ 94-2964								gut partly preserved, bursa and inverted pharynx																																**********
WQ 94-3103								gut preserved, SLE + undet elements																																**********
WQ 94-3169				?				gut preserved, SLE + possible arthropod thoracic elements (Trilobite ?)																																**********
WQ 94-3301								gut preserved (partly), everted pharynx, no visible elements																																**********
WQ 94-3302								gut preserved, no elements																																OOOOOOOOO
WQ 94-3364								very small worm, gut preserved, no visible element																																**********
WQ 94-3375								Bradoriid (2 BD), Agnostid (1 AG)																																**********
WQ 94-3436				?				possible arthropod larval stage (Trilobite ?)																																**********
WQ 94-3440								gut preserved , undet elements																																**********
WQ 94-3445								gut preserved , undet elements																																OOOOOOOOO
WQ 94-3476								gut preserved , undet elements																																**********
WQ 95-0322								gut partly preserved, numerous SLE																																**********
WQ 95-0508 (specimen 2)								numerous ASE (11 sclerites with striae, aligned)	61768	12A-C, G,H																														**********
WQ 95-0539								gut preserved,no contents, inverted pharynx, bursa and posterior hooks	61769	2H																														**********
WQ 95-0579								gut preserved with ASE (8 sclerites; only one with definite shape)																																**********
WQ 95-0590								ASE ( sclerites with central ridge), Agnostid (possibly Pagetia bootes) + other undet elements	61770	8G,H																														**********
WQ 95-0925								numerous SLE, black residues	61787	11																														**********
WQ 95-0926							?	gut preserved, numerous fragments and possible SLE																																**********
WQ 95-0956								gut preserved, SLE in pouch-like structure	61788	11																														**********
WQ 95-1061								ASE (1 striated sclerite)																																**********
WQ 95-1094						?		possible ASE, SLE setae and other tiny fragments	61771	9J																														**********
WQ 95-1135				?				possible Bradoriid + undet elements																																**********
WQ 95-1183 (specimen 1)								small worm (undet elements in gut)																																**********
WQ 95-1223								Hyolithid (1 CN) + possible Agnostid + SLE + undet elements																																**********
WQ 95-1224								gut preserved, undet elements																																**********
WQ 95-1346								gut partly preserved, undet residues (only fragments)																																**********
WQ 95-1352B						?		several worms (in decay), SLE + possible ASE	61772B	10E																														**********
WQ 95-1352A								several worms (in decay), SLE + possible ASE
WQ 95-1457								gut preserved , black residues + undet elements (grains), possible Agnostid																																**********
WQ 95-1523 (specimen 2)								Hyolithid (3 CN)	61773A	12E																														**********
WQ 95-1523 (specimen 3)								ASE (7 sclerites, 2 of them well-preserved, probably striated)																																**********
WQ 95-1543								Hyolithid (1 CN)																																**********
WQ 95-1578 (specimen 1)								gut preserved with white parts (pyrite ?)																																**********
WQ 95-1578 (specimen 2)								gut preserved, numerous undet elements																																**********
WQ 95-1632								small worm with undet 3D residues																																**********
WQ 95-1649								ASE (6 sclerites or more in a loop) + SLE + undet elements																																**********
WQ 95-1650								gut preserved (whitish parts), SLE (in pouch)																																**********
WQ 95-1664								Bradoriid																																**********
WQ 95-1776								possible ASE in posterior gut																																**********
WQ 95-1885								Hyolithid (2 CN) + undet Brachiopod + undet fragments																																**********
WQ 95-1889								posterior gut with undet granular fragments in 3D																																**********
WQ 95-1931								SLE (packed)																																**********
WQ 95-1960								only molt, no gut structure																																OOOOOOOOO
WQ 95-2089								gut preserved, long black ribbon (undet elements inside)																																**********
WQ 95-2455								gut preserved, undet elements																																**********
WQ 95-2459								gut preserved, undet elements																																**********
WQ 97-0453								very small worm, gut preserved, no element																																OOOOOOOOO
WQ 97-0602								Hyolithid (1 CN), ASE (2 or 3) + undet. elements																																**********
WQ 97-0656								gut only partly preserved, ASE (2 elements)																																**********
WQ 97-0759								gut preserved, ASE (1 or 2 elements)																																**********
WQ 97-0801								gut preserved, Hyolithid (1 CN, OP) + ASE																																**********
WQ 97-0818								gut preserved, ASE (6 elements, outline not well-defined)																																**********
WQ 97-0861A								numerous ASE (8 possibly 11 elements; 2 of them well-defined with striae)	61781A	12F																														**********
WQ 97-1241								Hyolithid (5 CN) + undet elements	61782	7B-E																														**********
WQ 97-2267								numerous worms (very poorly preserved guts)																																**********
WQ 97-2268								gut preserved; fine 3D-residues in posterior part																																**********
WQ 97-2524								Trilobite (near anus opening)																																OOOOOOOOO
WQ 98-0336								gut partly-preserved; Agnostid (Ptychagnostus praecurenss)																																**********
WQ 98-0653								gut not well defined, Bradoriid (with 2 valves in butterfly position)																																**********
WQ 98-0789								gut preserved, numerous ASE (7 elements, some well-delimited with striae)																																**********
WQ 98-0825B								gut not well-defined, 3D preserved ASE (6 elements, one with bulbous part)	61763B	13C,D																														**********
WQ 98-0858								small worm, gut well-preserved,possible Hyolithid (1 CN) + undet 3D elements																																**********
WQ 98-1292								specimen folded (gut poorly preserved)																																**********
WQ 98-1903								gut preserved, possible Brachiopod (Micromitra) + black residues																																**********
WQ 98-2038								gut almost complete, Hyolithid (2 CN)																																**********
WQ 98-2190								gut not well-preserved, Hyolithid (2 CN)																																**********
WQ 99-0421								gut preserved, possibly reticulated brachiopod + undet elements																																**********
WQ 99-0634								gut partly preserved, black residues in separate blocks																																**********
WQ 99-0770	?							gut preserved, undet elements (possible HE)																																**********
WQ 99-0809								gut almost complete, agnostid in pharynx AG (Ptychagnostus praecurrens)	61775	6L,M																														**********
WQ 99-0826 (specimen 1)								gut preserved in part, Hyolithid (2 CN)																																**********
WQ 99-1048								gut partly preserved, undet elements																																**********
WQ 99-1115								gut partly preserved, uncomplete specimen, Hyolithid (OP) Trilobite (probably PY Ehmaniella)	61777	6N,O																														**********
WQ 99-1297								black residues in posterior part + undet 3D- elements																																**********
WQ 99-1316								complete specimens, gut partly preserved , Trilobite (CE, Ehmaniella)	61785	6P, 9A,B																														**********
WQ 99-1744								gut not well-preserved, undet element																																**********
WQ 99-3649								gut preserved but detached and sinuous, long black residues																																**********
WT
Field nb.	HY	BR	AG	TR	BD	ASE	SLE	description	ROM nb.
WT 75-1510								Trilobite (2 TR)																																**********
WT 75-1514								Bradoriid																																**********
WT 75-1548A								SLE + black residues	61746	10F, 11																														**********
WT 75-1548B								ASE (possibly 4 elements)
WT 75-4938								Hyolithid (2CN, OP, HE) + residues (granules)	38609																															**********
WT 90-0121								Hyolithid (1 CN)																																**********
WT 93-0889A, B								SLE (black mass)	61755A, B	5E, F, I-K, 10A-D, 11																														**********
WT 95-0119								black residues in anterior gut																																**********
WT 99-0342								gut well-preserved, undet elements																																**********
WT 99-0624								SLE																																**********
BW
Field nb.	HY	BR	AG	TR	BD	ASE	SLE	description	ROM nb.
BW 95-1573								Hyolithid (1 CN)	61774	6G																														**********
BW 95-1664								gut well-preserved, Bradoriid (Liangshanella)	61776	9F,G																														**********
BW 98-0575								small worm with gut preserved, no visible elements																																**********
ABBREVIATIONS
AG	Agnostid (Arthropoda)
ASE	Almond-shape element (assumed wiwaxiid sclerite)
BD	Bradoriid (Arthropoda)
BR	Brachiopod
BW	litt. "Below Walcott" (collections made in the Walcott Quarry, below the Phyllopod Bed
CE	Cephalon
CN	Hyolithid cone
HE	Hyolithid helens
HY	Hyolithid
OP	hyolithid operculum
PY	Pygidium
ROM	Royal Ontario Museum, Toronto, Canada
RQ	Raymond Quarry
RT	Raymond Talus
SLE	Setae-like elements (assumed Burgessochaeta chaetae)
TR	Trilobite (Arthropoda)
USNM	Smithsonian National Museum of Natural History, Washington D.C. (originally US National Museum)
WQ	Walcott Quarry
WT	Walcott Talus
TABLE S1. Studied material (Ottoia prolifica from middle Cambrian Burgess Shale, British Columbia, Canada).
The specimens are housed in the Royal Ontario Museum (ROM), Toronto, Canada and the Smithsonian National Museum
of Natural History (originally US National Museum; USNM), Washington D.C. All the specimens have preserved digestive
tracts with or without gut contents.

## Sheet: Feuil2
USNM
Coll. nb.	HY	BR	AG	TR	BD	ASE	SLE	description	FIG. (this paper)
USNM 057619								gut preserved, no elements
USNM 138298 (3 specimens)								gut preserved , no elements inside
USNM 172978			?					possible Hyolithid and Agnostid + undet elements
USNM 172979								Hyolithid (1 CN) + undet elements
USNM 172984	?							possible Hyolithid (OP ?)
USNM 172988								gut preserved, undet grainy elements
USNM 188593								ASE (more than 10 striated elements), SLE
USNM 188604								Hyolithid (3 CN, OP)	7I
USNM 188608								gut almost complete, no residues, carbonaceous film
USNM 188608								complete gut but non elements
USNM 188609								well-preserved outline, no elements in gut
USNM 188615								only small area with undet residues
USNM 188620			?					elements present in gut (possibly Agnostid) + grainy residues
USNM 188639								well preserved gut contents (SLE+ other unknown elements)
USNM 196093								Hyolithid (1 CN, OP?)
USNM 196104	?		?					possible Agnostid + possibly Hyolithid and curved elements
USNM 196186								Hyolithid (1 CN, OP, HE)
USNM 196195								gut content with undet elements, possibly sponge spicules (see Lucie Wilson's PhD thesis)	5A-D
USNM 196202								possible ASE sclerites (conical elements with striae)
USNM 196204								Hyolithid (2 CN, OP), Brachiopod (Diraphora bellicostata)
USNM 196207								gut preserved, no visible elements
USNM 196225								Hyolithid (2 CN)	9E
USNM 196241								Association of at least 5 Ottoia around Sidneyia (1 Ottoia specimen with Hyolithid)	14A, B
USNM 196243								Trilobite (possibly PY)
USNM 196307								Hyolithid (4 CN)
USNM 196315								Bradoriid (butterfly position)
USNM 196318								ASE (6 elements in total)
USNM 196350								Hyolithid (2 CN, OP)
USNM 196381								Hyolithid (6 CN)	7F-H
USNM 196383								possible Trilobite / Agnostid remains + undet 3D elements
USNM 196425 specimen 2								possible Agnostid (complete specimen in gut)
USNM 196425 specimen 4								possible Trilobite (PY)
USNM 196444								Hyolithid (1 CN, OP)
USNM 196449								Hyolithid (2 CN) + residues outside anus
USNM 196455 specimen 1								Hyolithid (3 CN, OP)
USNM 196490								Hyolithid (1 CN)
USNM 196494								Hyolithid (2 CN) + ASE (striated elements)
USNM 196523								ASE (possibly 10 or more- two of them very well-preserved)
USNM 196896								Hyolithid (3 CN) + undet residues
USNM 198076								Hyolithid (1 CN, OP)
USNM 198565								very small worm with gut preserved (post)
USNM 198566								complete gut with some 3D-fine residues
USNM 198571								gut preserved, undet elements
USNM 198577								gut complete with loop (undet residues in posterior part)
USNM 198587								long gut section filled with tiny residues (grains + rare setae)
USNM 198589								residues in posterior section (SLE + small grains)
USNM 198818								only proboscis with invaginated pharynx
USNM 198827								Hyolithid (1 CN, OP?)
USNM 198861								gut preserved,long ribbon with 3D residues in gut (grains) l
USNM 198885								Hyolithid (1 CN)
USNM 198895								Hyolithid (2 CN)
USNM 198907								Hyolithid (1 CN) + possible brachiopod or hyolith opercule + undet residues
USNM 198922								gut partly preserved (no Ottoia in gut- see Conway Morris 1977- cannibalism not confirmed)
USNM 198984								Hyolithid (1 CN, OP) + undet residues
USNM 199083 specimen 1								Hyolithid (1 CN)
USNM 199083 specimen 2								Hyolithid (4 CN)
USNM 199083 specimen 3								Agnostid (PY)
USNM 199096								gut with undet 3D-preserved elements
USNM 199109								Hyolithid (1CN , OP)
USNM 199118								Hyolithid (1 CN)
USNM 199413								looped gut with residues (grains + elliptical body)
USNM 1998857								gut preserved, no visible contents
USNM 202777								Hyolithid (2 CN, near anus)	6H
USNM 250218								Association of 1 Ottoia around Sidneyia	14E, F
USNM 275503								Agnostid
USNM 281889								possible Hyolithid
USNM 281996								introvert (spines ) well preserved
USNM no number specimen 1			?					Hyolithid (2 CN + 2 possible Agnostids + ASE (more than 8 elements)
USNM no number specimen 2								Hyolithid (1 CN + OP)
ABBREVIATIONS
AG	Agnostid (Arthropoda)
ASE	Almond-shape element (assumed wiwaxiid sclerite)
BD	Bradoriid (Arthropoda)
BR	Brachiopod
BW	litt. "Below Walcott" (collections made in the Walcott Quarry, below the Phyllopod Bed
CE	Cephalon
CN	Hyolithid cone
HE	Hyolithid helens
HY	Hyolithid
OP	hyolithid operculum
PY	Pygidium
ROM	Royal Ontario Museum, Toronto, Canada
RQ	Raymond Quarry
RT	Raymond Talus
SLE	Setae-like elements (assumed Burgessochaeta chaetae)
TR	Trilobite (Arthropoda)
USNM	Smithsonian National Museum of Natural History, Washington D.C. (originally US National Museum)
WQ	Walcott Quarry
WT	Walcott Talus
